# Supplementary material for: Nanosheet arrays derived from ZIF-67 grown on three-dimensional frameworks for the electrocatalytic oxygen evolution reaction
Source: Royal Society of Chemistry journal article supplement (doi:10.1039/d4dt02635g), 2024-12-03
Supplement: d4dt02635g1.pdf [file d4dt02635g1.pdf]

**Nanosheet arrays derived from ZIF-67 grown on three-dimensional frameworks for electrocatalytic oxygen evolution reaction**

Jiangyan Dang, Jingjing Qiu, Xiaoying Zhang,\* and Jingping Zhang\*

Jilin Provincial Key Laboratory of Organic Functional Molecular Design & Synthesis,

Faculty of Chemistry, Northeast Normal University, Changchun, 130024, P.R. China

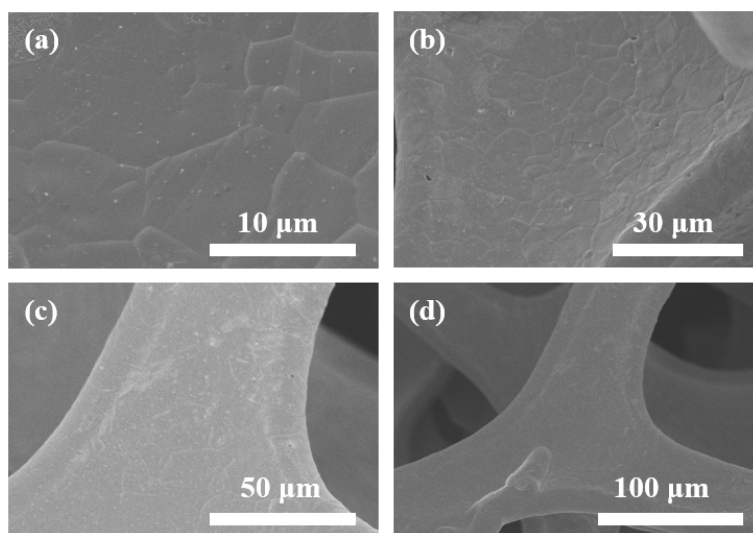

**Fig. S1** SEM images of acidified NF in different sizes.

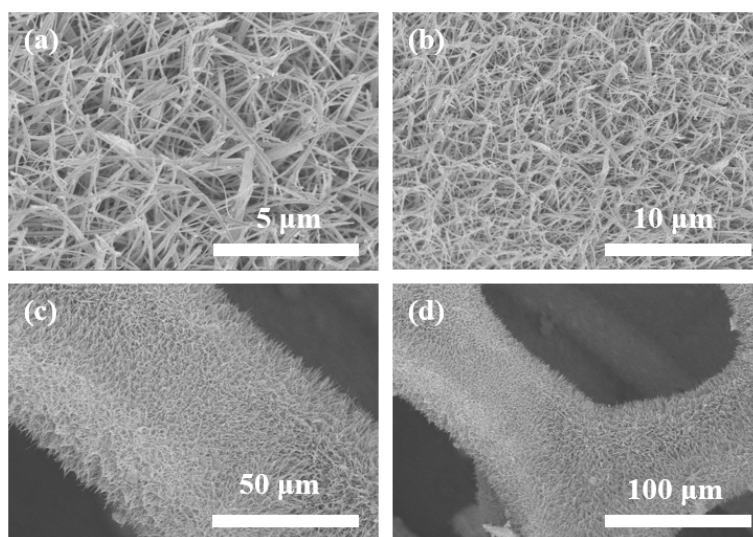

**Fig. S2** SEM images of NiSe<sub>x</sub>/NF in different sizes.

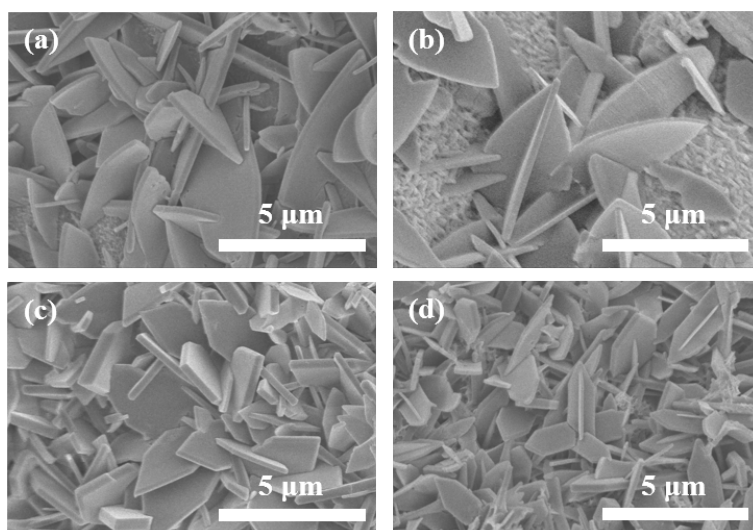

**Fig. S3** SEM images of ZIF-67/NiSe<sub>x</sub>/NF with Se content of (a) 4 mg, (b) 8 mg, (c) 16 mg and (d) 32 mg, respectively.

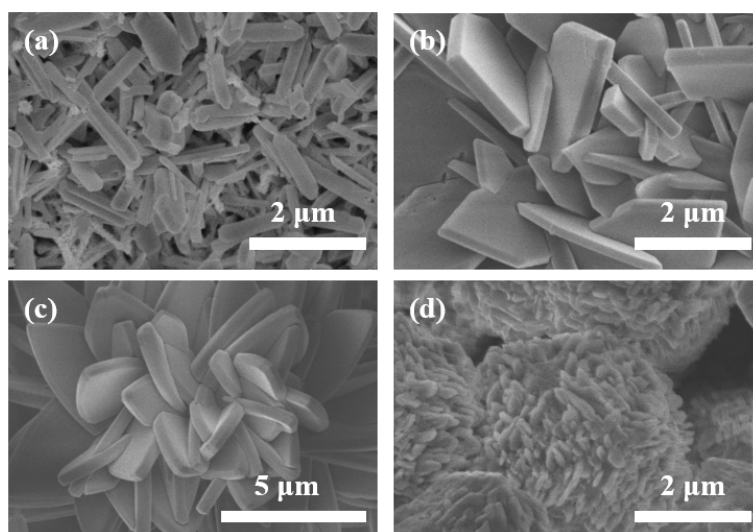

**Fig. S4** SEM images of ZIF-67/NiSe<sub>x</sub>/NF with molar ratios of Co<sup>2+</sup> to 2-MeIm of (a) 1:4, (b) 1:8, (c) 1:16 and (d) 1:32, respectively.

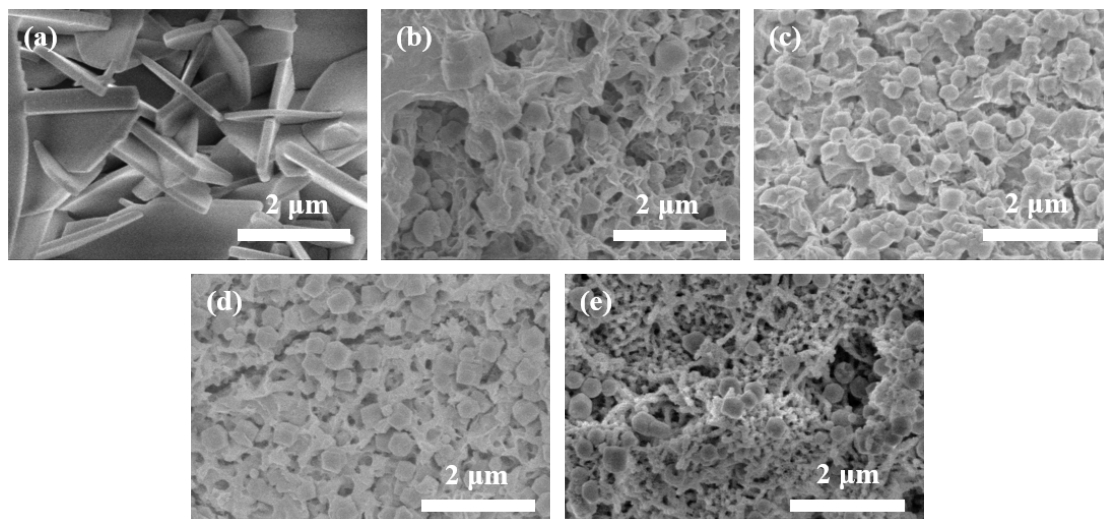

**Fig. S5** SEM images of ZIF-67/NiSe<sub>x</sub>/NF prepared under the solvent volume ratio of methanol to water = 0:1 (a), 1:3 (b), 1:1 (c), 3:1 (d) and 1: 0 (e) for the synthesis of ZIF-67.

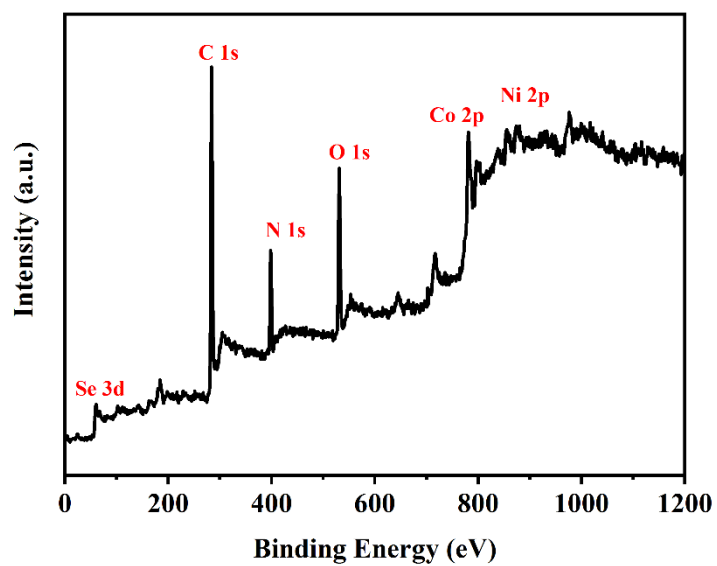

**Fig. S6** XPS survey spectrum of the ZIF-67/NiSe<sub>x</sub>/NF-1 catalyst.

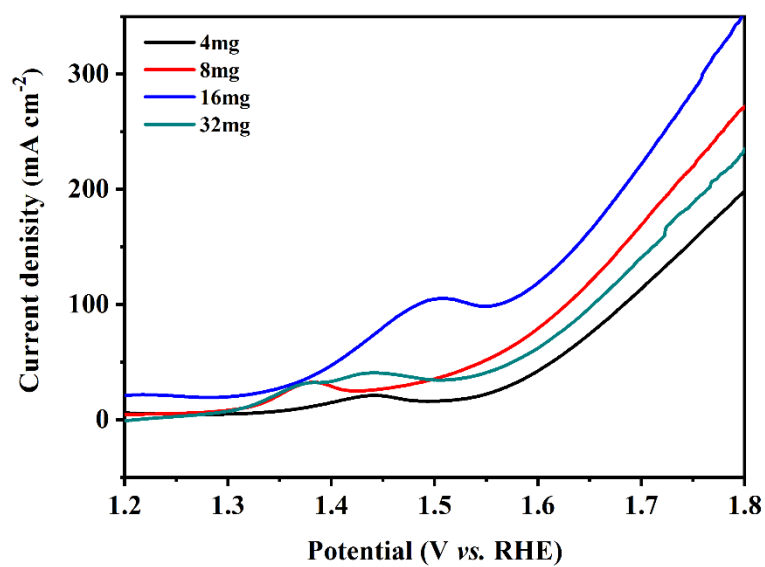

**Fig. S7** The LSV curves of 4 mg, 8 mg, 16 mg, and 32 mg of Se, respectively.

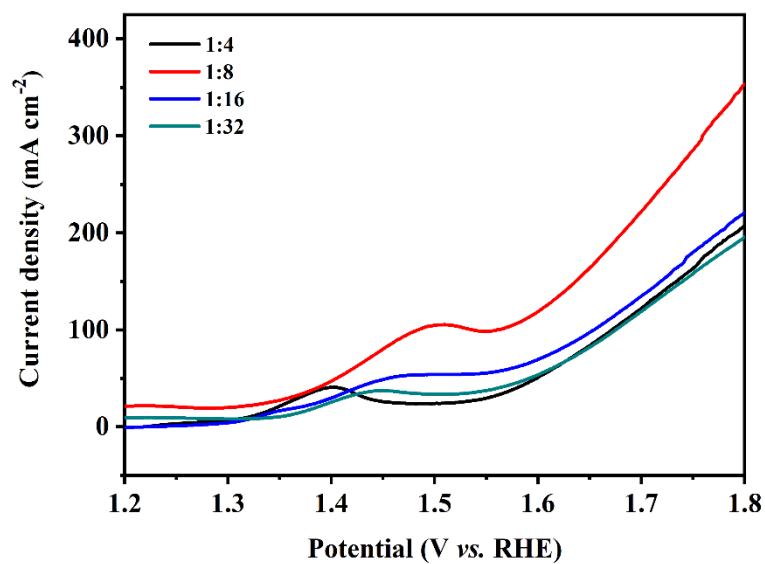

**Fig. S8** LSV curves with molar ratios of Co<sup>2+</sup> to 2-MeIm at 1:4, 1:8, 1:16, and 1:32, respectively.

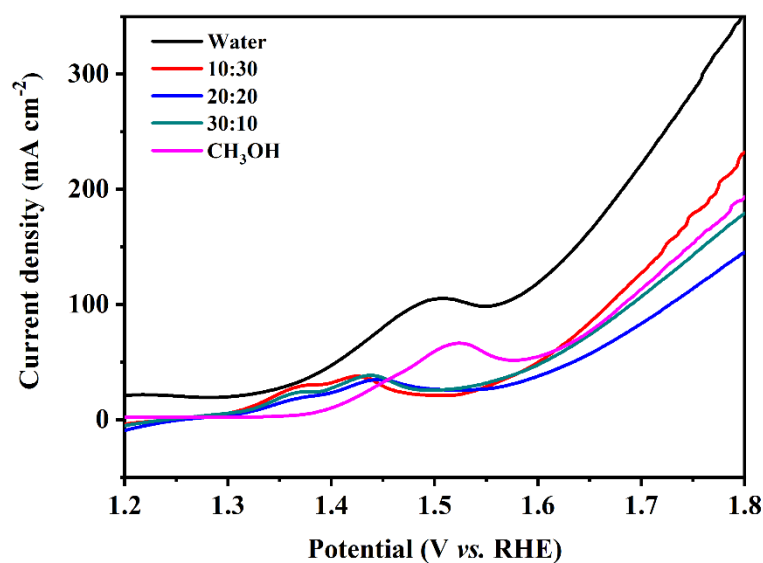

**Fig. S9** LSV curves of solvent ratio of water to methanol = 1:0, 1:3, 2:2, 3:1, 0:1 for synthesizing ZIF-67.

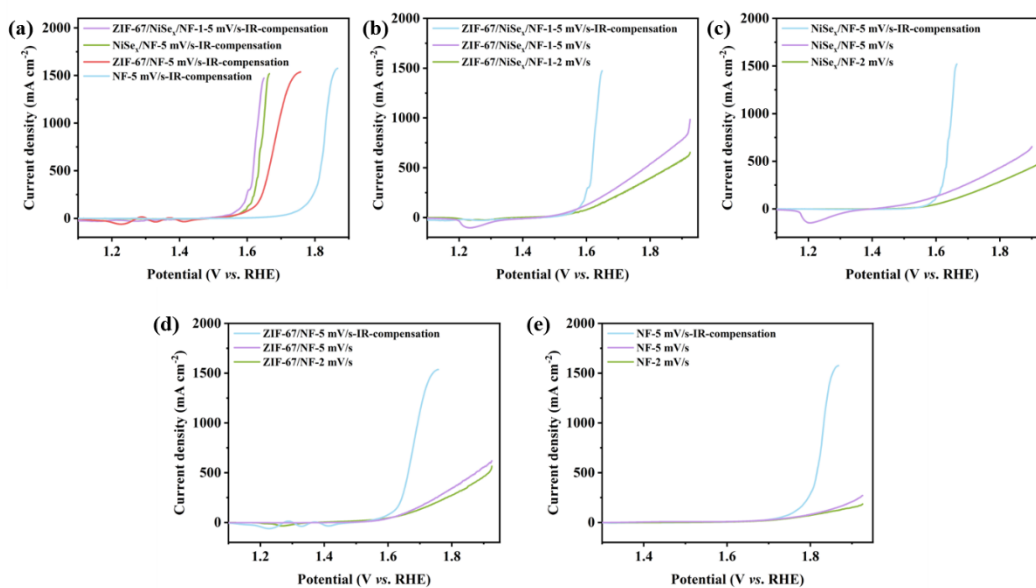

**Fig. S10** (a) LSV curves of pure NF, NiSe<sub>x</sub>/NF, ZIF-67/NF, and ZIF-67/NiSe<sub>x</sub>/NF-1 with IR correction in 1.0 M KOH; LSV curves of (b) ZIF-67/NiSe<sub>x</sub>/NF-1, (c) NiSe<sub>x</sub>/NF, (d) ZIF-67/NF, and (e) pure NF with and without IR corrections.

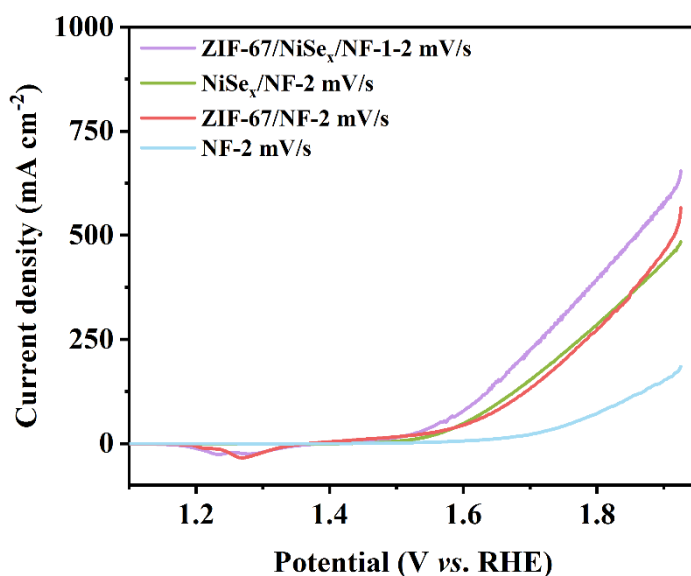

**Fig. S11** LSV curves of pure NF, NiSe<sub>x</sub>/NF, ZIF-67/NF, and **ZIF-67/NiSe<sub>x</sub>/NF-1** at a scanning speed of 2 mV/s.

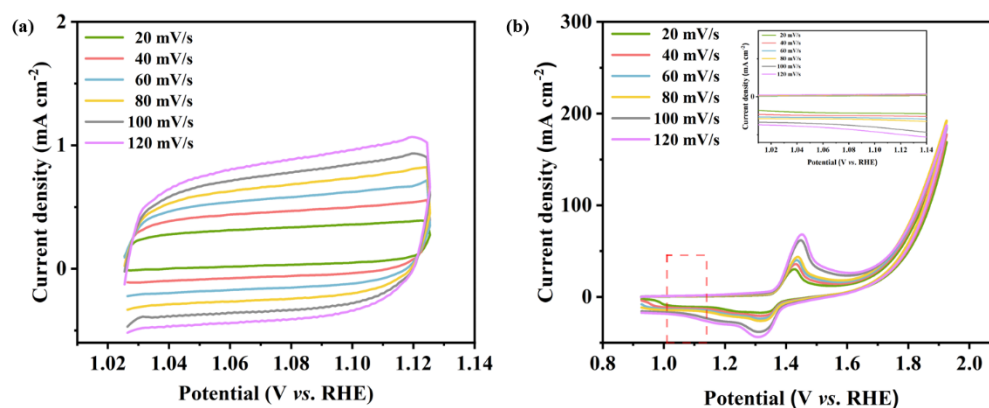

**Fig. S12** (a) Cyclic voltammetry (CV) curves of the catalysts recorded from 1.024 to 1.124 V at different rates (20 to 120 mV s<sup>-1</sup>) for NF in 1.0 M KOH; (b) CV curves of the catalysts recorded from 0.9254 to 1.9254 V at different rates (20 to 120 mV s<sup>-1</sup>) for NF in 1.0 M KOH.

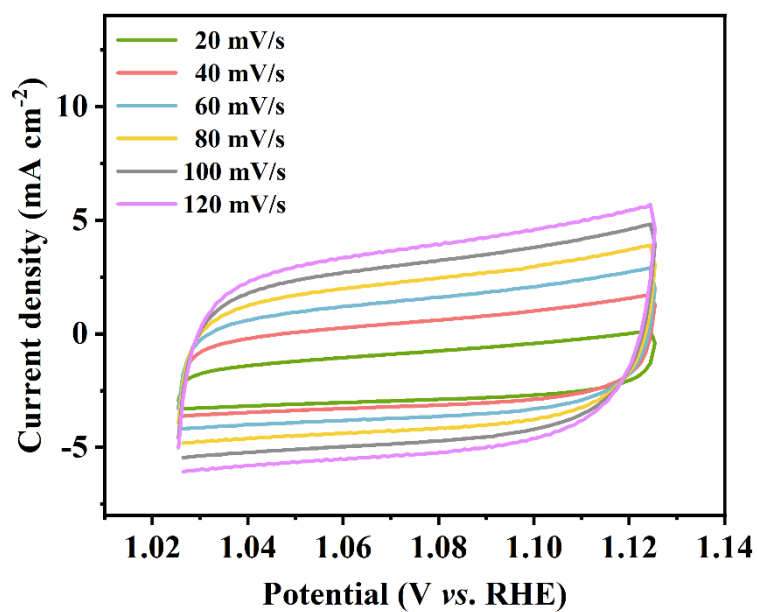

**Fig. S13** CV curves of the catalysts recorded from 1.024 to 1.124 V at different rates (20 to 120 mV s<sup>-1</sup>) for NiSe<sub>x</sub>/NF in 1.0 M KOH.

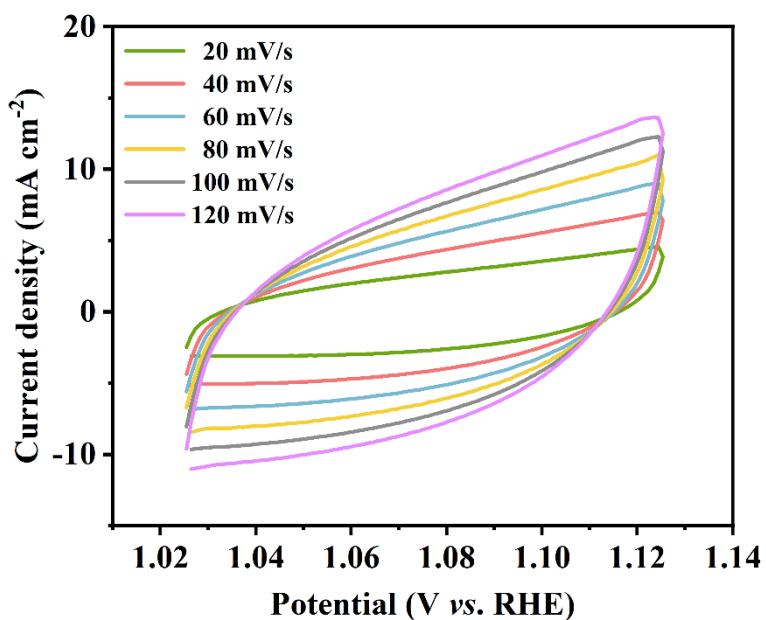

**Fig. S14** CV curves of the catalysts recorded from 1.024 to 1.124 V at different rates (20 to 120 mV s<sup>-1</sup>) for ZIF-67/NF in 1.0 M KOH.



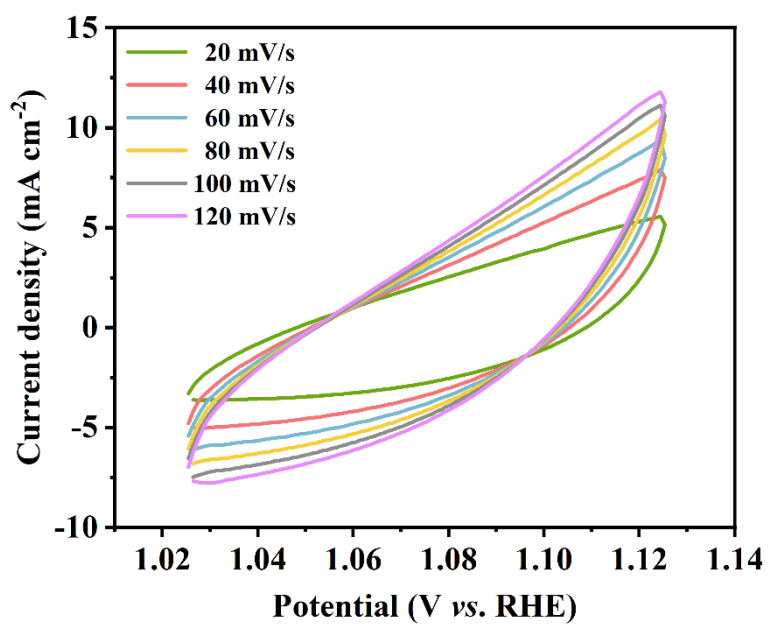

**Fig. S15** CV curves of the catalysts recorded from 1.024 to 1.124 V at different rates (20 to 120 mV s<sup>-1</sup>) for **ZIF-67/NiSe<sub>x</sub>/NF-1** in 1.0 M KOH.

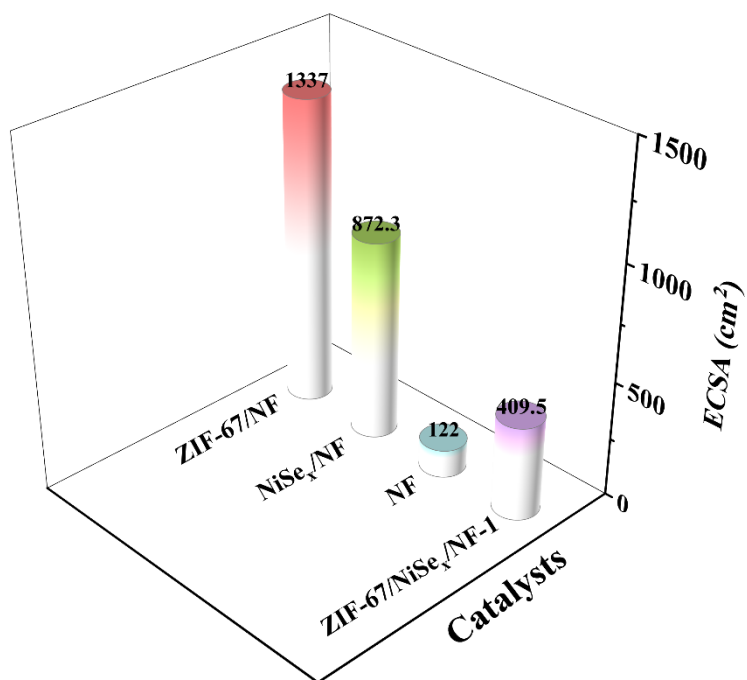

**Fig. S16** ECSA of pure NF, NiSe<sub>x</sub>/NF, ZIF-67/NF, and **ZIF-67/NiSe<sub>x</sub>/NF-1**.

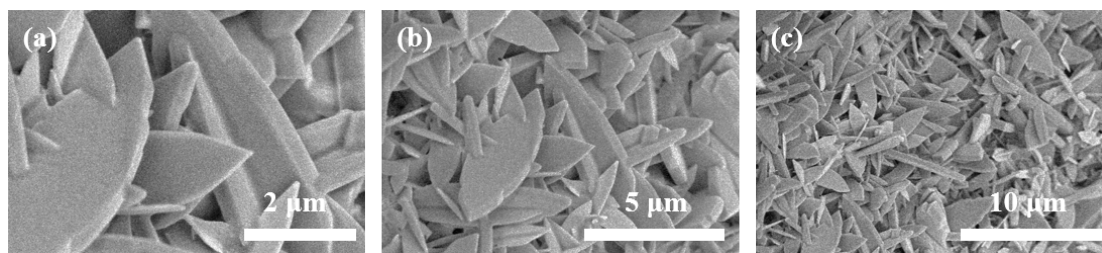

**Fig. S17** SEM images of **ZIF-67/NiSe<sub>x</sub>/NF-1** after 55 h stability test.

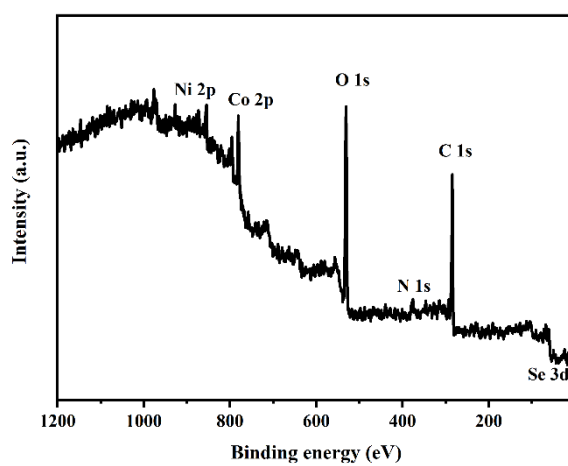

**Fig. S18** The XPS survey spectra of **ZIF-67/NiSe<sub>x</sub>/NF-1** after 55 h stability test.

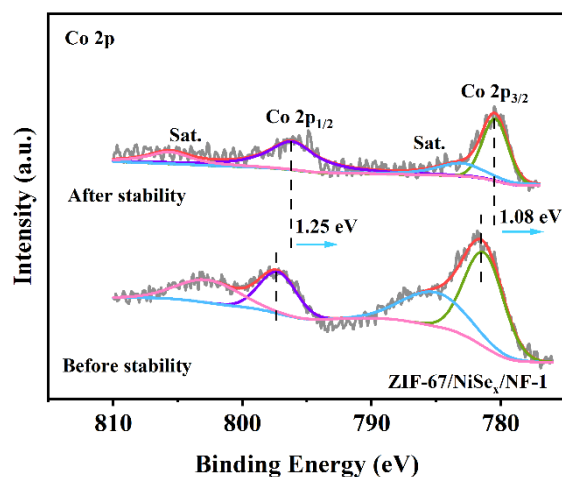

**Fig. S19** Co 2p XPS spectra for the initial **ZIF-67/NiSe<sub>x</sub>/NF-1** and the one after OER test samples.

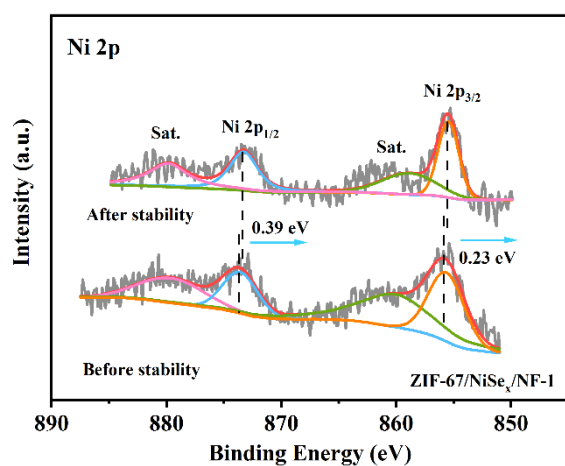

**Fig. S20** Ni 2p XPS spectra for the initial **ZIF-67/NiSe<sub>x</sub>/NF-1** and the one after OER test samples.

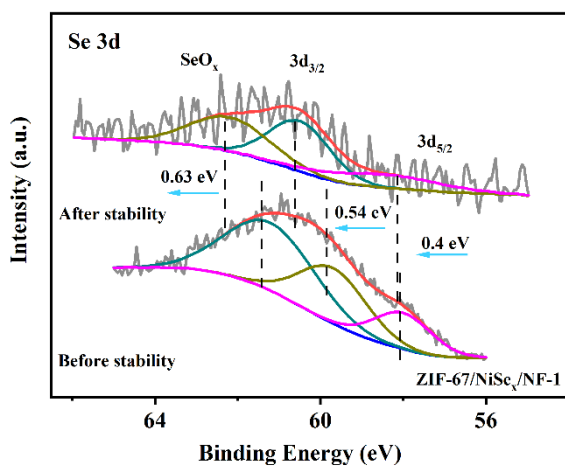

**Fig. S21** Se 3d XPS spectra for the initial **ZIF-67/NiSe<sub>x</sub>/NF-1** and the one after OER test samples.
